# Supplementary material
Source: MDPI journal article supplement (https://www.mdpi.com/2227-9717/10/8/1439)
Supplement: s1 [file s1 › processes-1809924-supplementary.pdf]

# Supplementary material

<sup>1</sup>H-RMN  
CDCl<sub>3</sub>  
Avance III HD 500 MHz

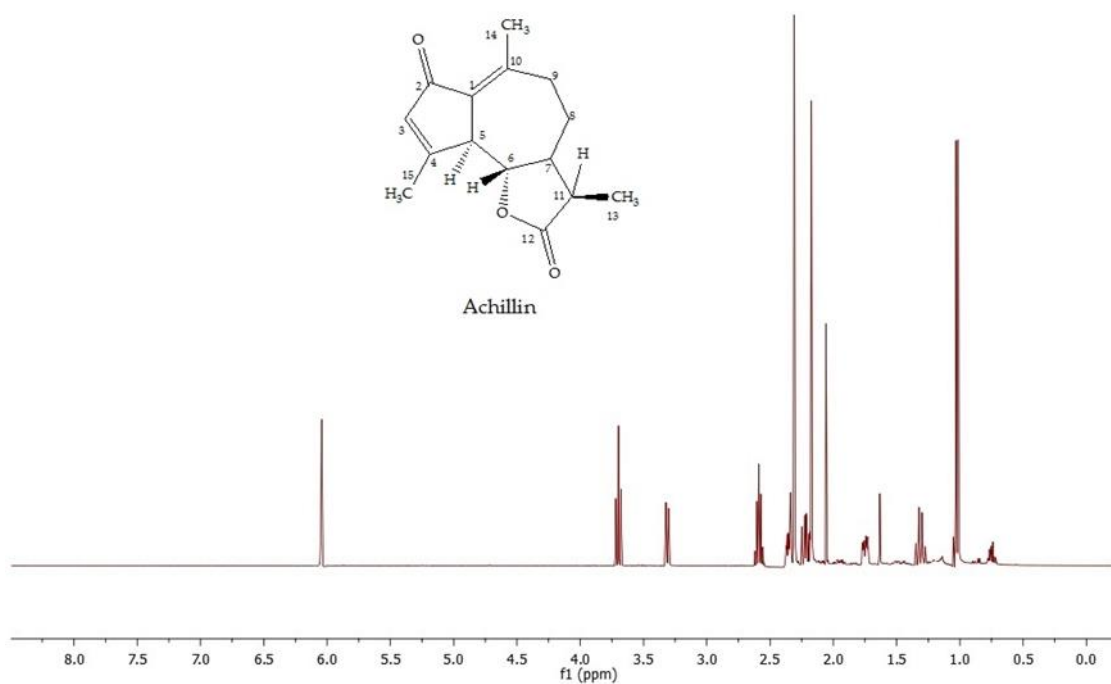

**Figure S1.** <sup>1</sup>H NMR (500 MHz, CDCl<sub>3</sub>) of Achillin.

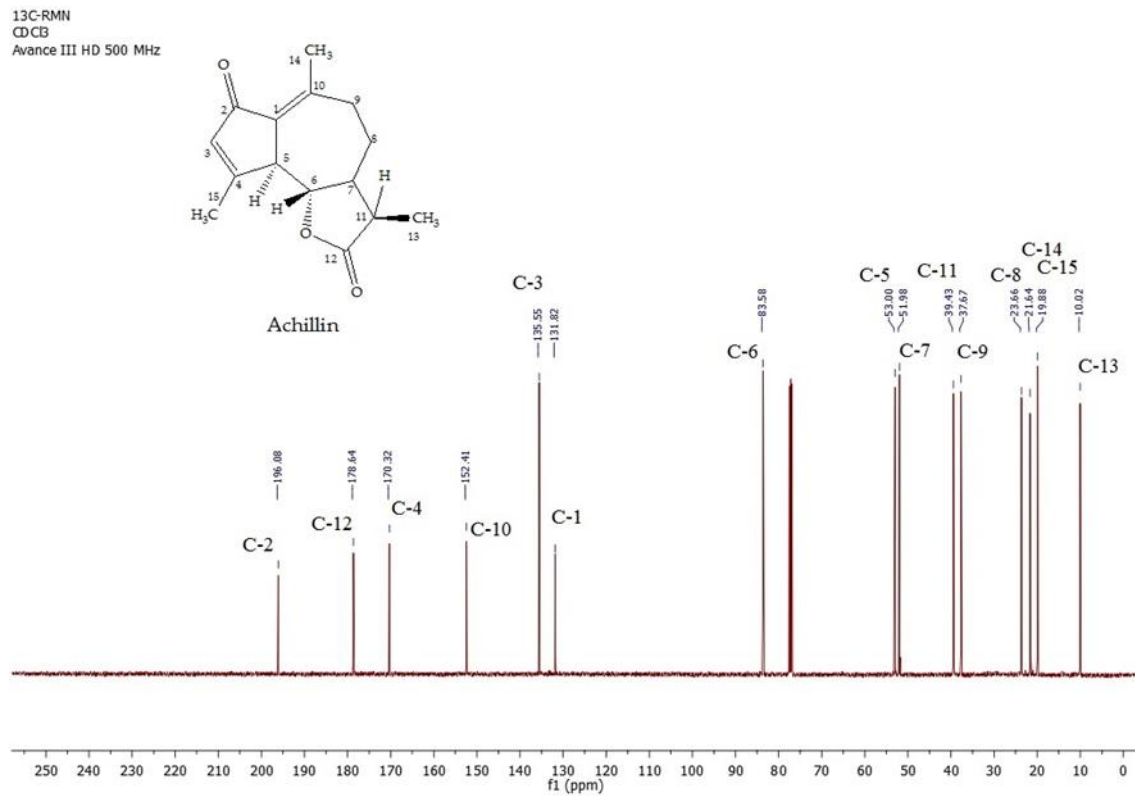

Figure S2. <sup>13</sup>C NMR (125 MHz, CDCl<sub>3</sub>) of Achillin.

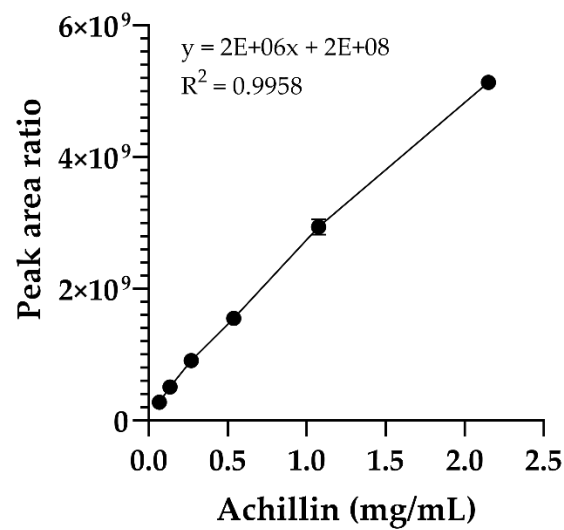

Figure S3. Calibration curve using achillin compound isolated of wild plant.
